# Supplementary material for: Comparison of size distribution and electrical particle sensor measurement methods for particle lung deposited surface area (LDSA al ) in ambient measurements with varying conditions
Source: Copernicus journal article supplement (doi:10.5194/ar-2-271-2024), 2024-09-26
Supplement: Supplementary file 1 [file ar-2-271-2024-supplement.pdf]

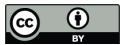

*Supplement of*

**Comparison of size distribution and electrical particle sensor measurement methods for particle lung deposited surface area (LDSA<sup>al</sup>) in ambient measurements with varying conditions**

**Teemu Lepistö et al.**

*Correspondence to:* Teemu Lepistö ([teemu.lepisto@tuni.fi](mailto:teemu.lepisto@tuni.fi))

The copyright of individual parts of the supplement might differ from the article licence.

## Measurement locations

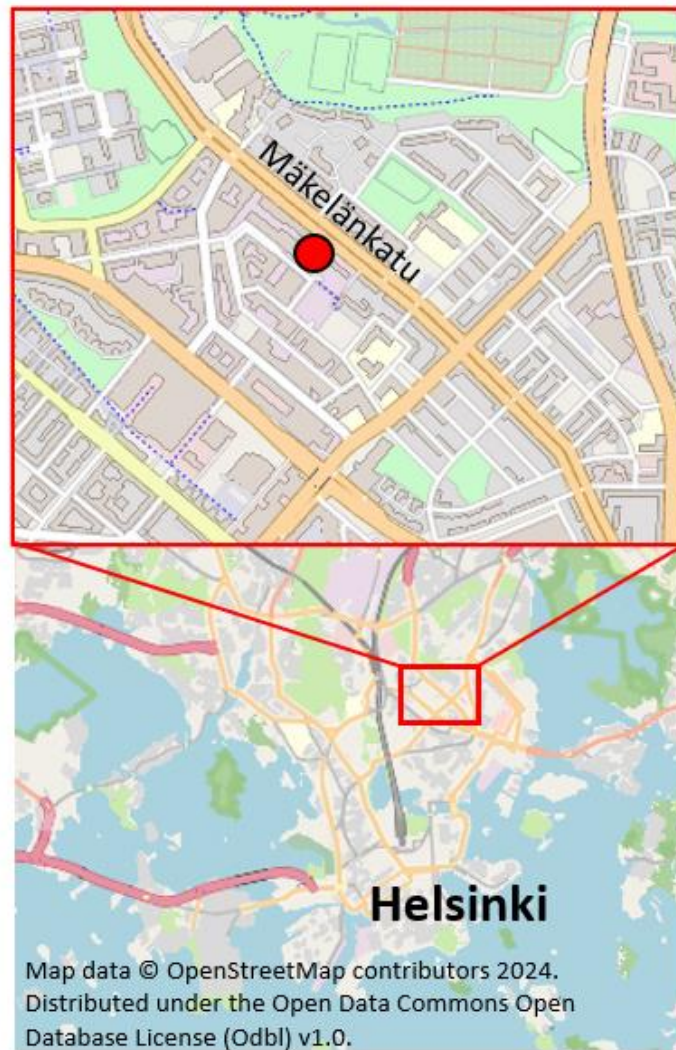

Figure S1: Measurement location in Helsinki (see also Teinilä et al. 2024)

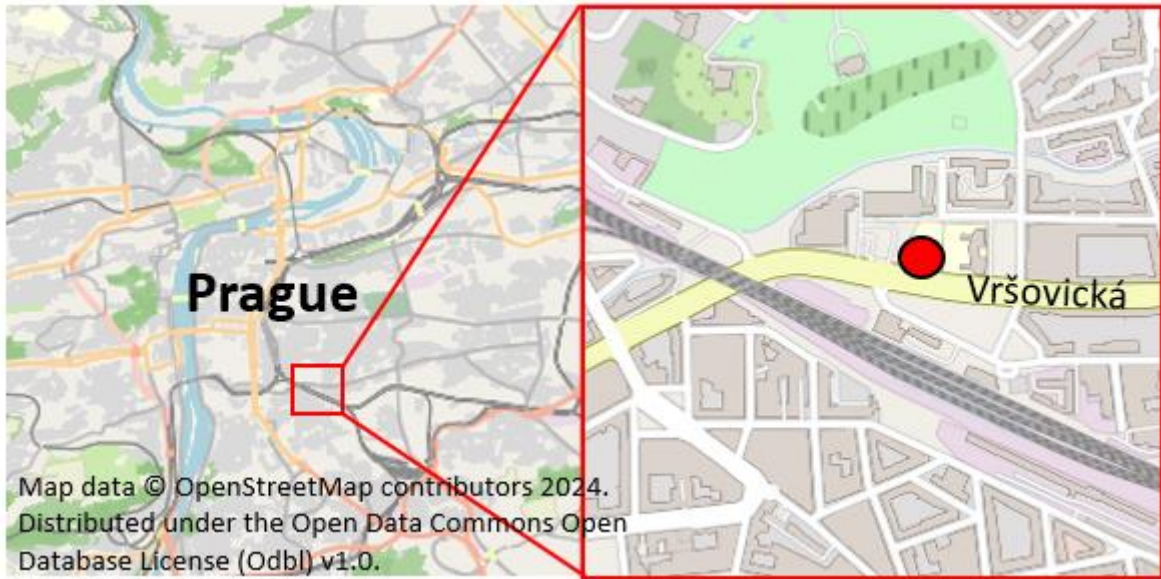

Figure S2: Measurement location in Prague (see also Lepistö et al. 2023)

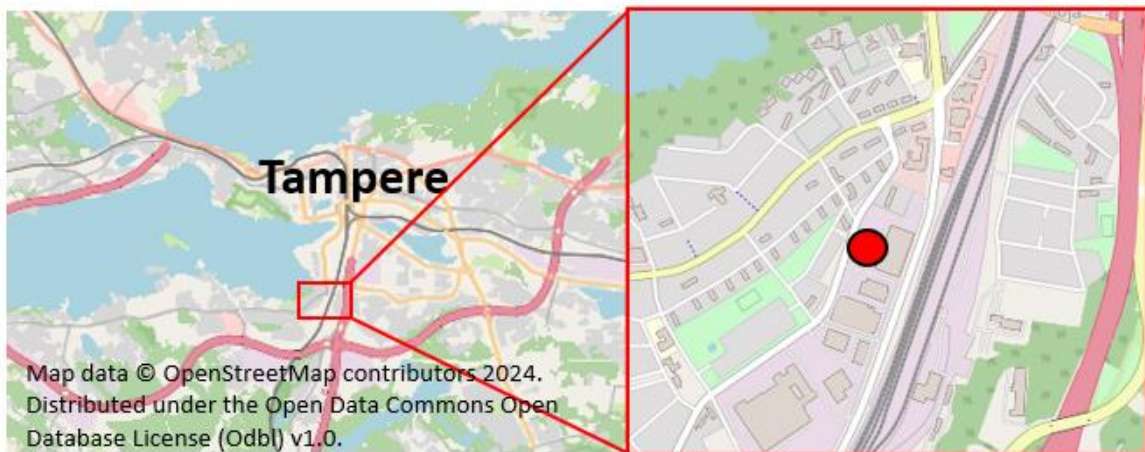

Figure S3: Measurement location in Tampere (see also Silvonen et al. 2023)



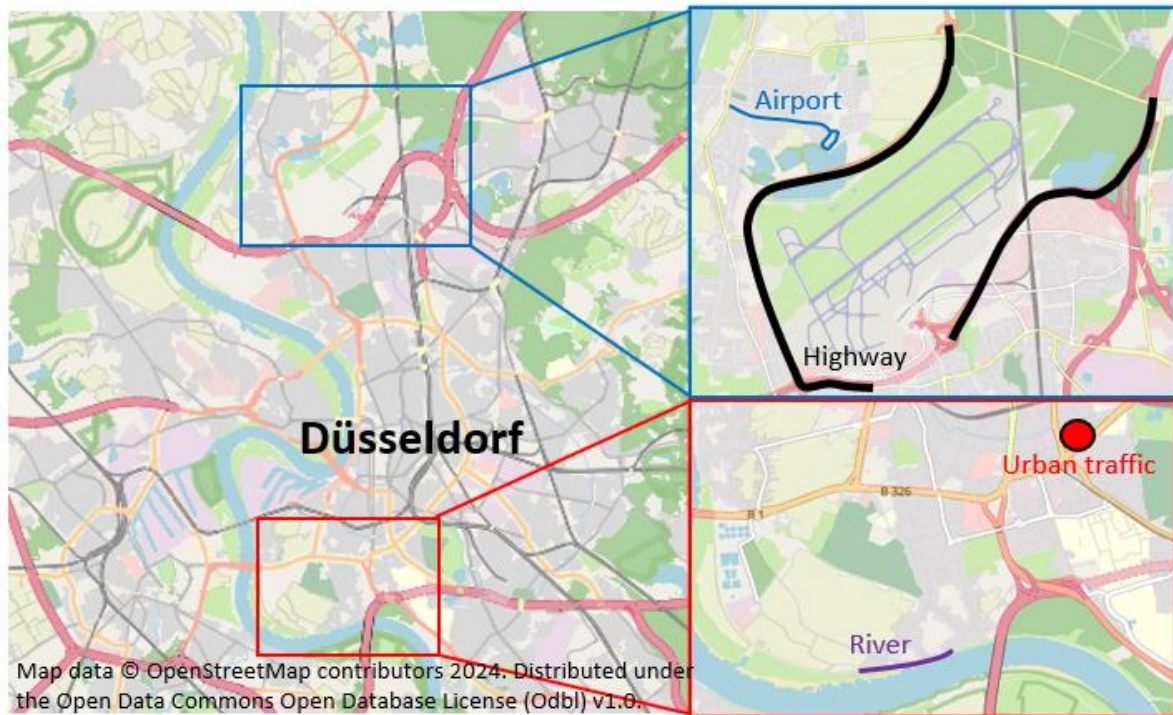

Figure S4: Measurement locations in Düsseldorf. Black and purple lines indicate driving measurements, and the red dot stationary measurements (see also Lepistö et al. 2023)

Table S1: Parameters utilised in the ICRP model calculation (ICRP 1994, Hinds 1999)

|                       | <b>Functional Reserve Capacity, FRC (l)</b> | <b>Breathing rate (m<sup>3</sup>/h)</b> | <b>Breathing Frequency (1/min)</b> | <b>Tidal Volume (l)</b> |
|-----------------------|---------------------------------------------|-----------------------------------------|------------------------------------|-------------------------|
| <b>Female</b>         |                                             |                                         |                                    |                         |
| <i>Sitting</i>        | 2.68                                        | 0.39                                    | 14                                 | 0.46                    |
| <i>Light Exercise</i> | 2.68                                        | 1.25                                    | 21                                 | 0.99                    |
| <i>Heavy Exercise</i> | 2.68                                        | 2.7                                     | 33                                 | 1.36                    |
| <b>Male</b>           |                                             |                                         |                                    |                         |
| <i>Sitting</i>        | 3.30                                        | 0.54                                    | 12                                 | 0.75                    |
| <i>Light Exercise</i> | 3.30                                        | 1.5                                     | 20                                 | 1.25                    |
| <i>Heavy Exercise</i> | 3.30                                        | 3                                       | 26                                 | 1.92                    |

## Particle effective density

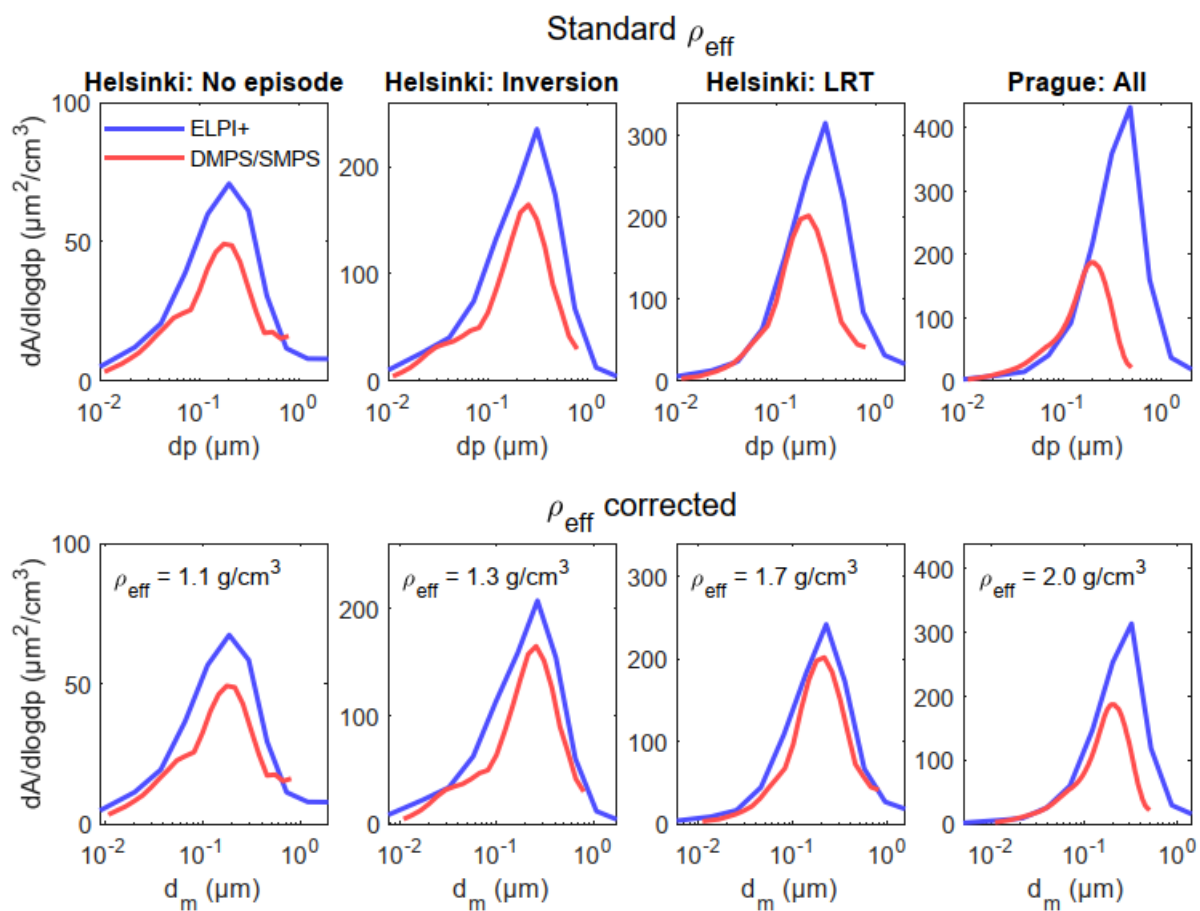

Figure S5: Average particle surface area size distributions measured with the ELPI+, DMPS (Helsinki) and SMPS (Prague) during the studied periods with and without corrections for the particle effective density.

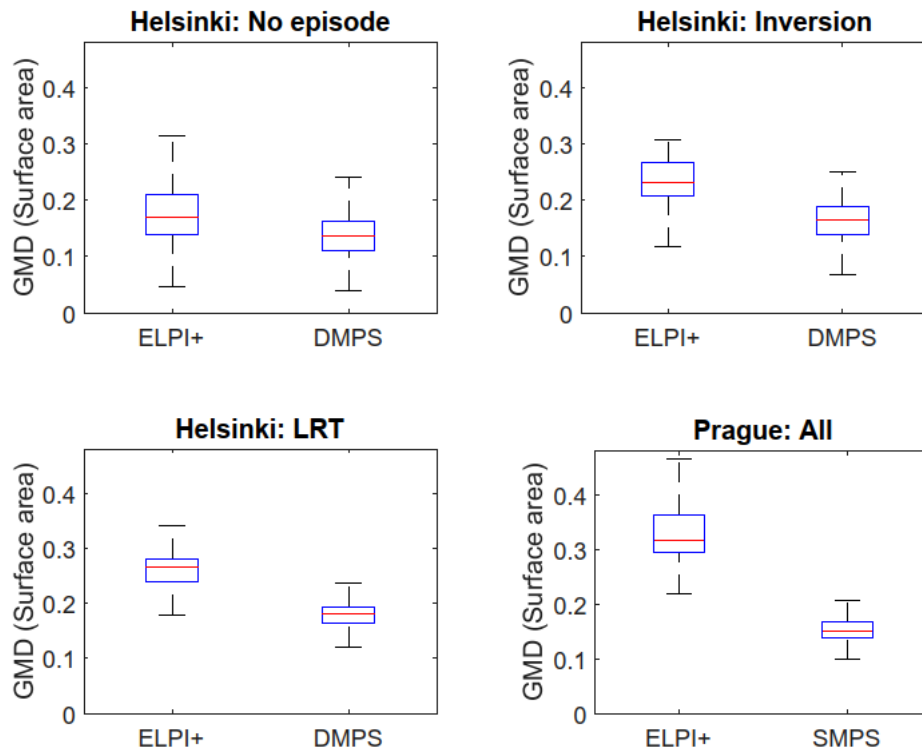

Figure S6: Boxplots of the measured geometric mean diameters of particle surface area size distributions with the ELPI+ (aerodynamic diameter) and DMPS or SMPS (mobility equivalent diameter).

## Particle hygroscopicity and the lung deposition

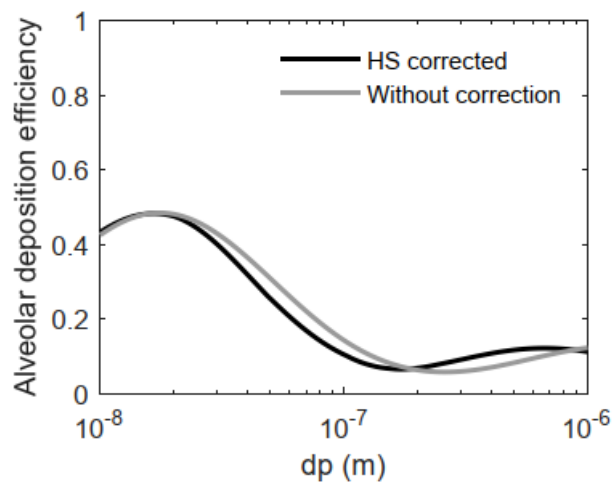

Figure S7: The utilised function of particle lung deposition efficiency (standard  $\rho_{\text{eff}}$ ) in the lung alveoli with and without correction for the particle hygroscopicity (Vu et al. 2015) for road traffic environments.

## Histograms of the measured concentrations

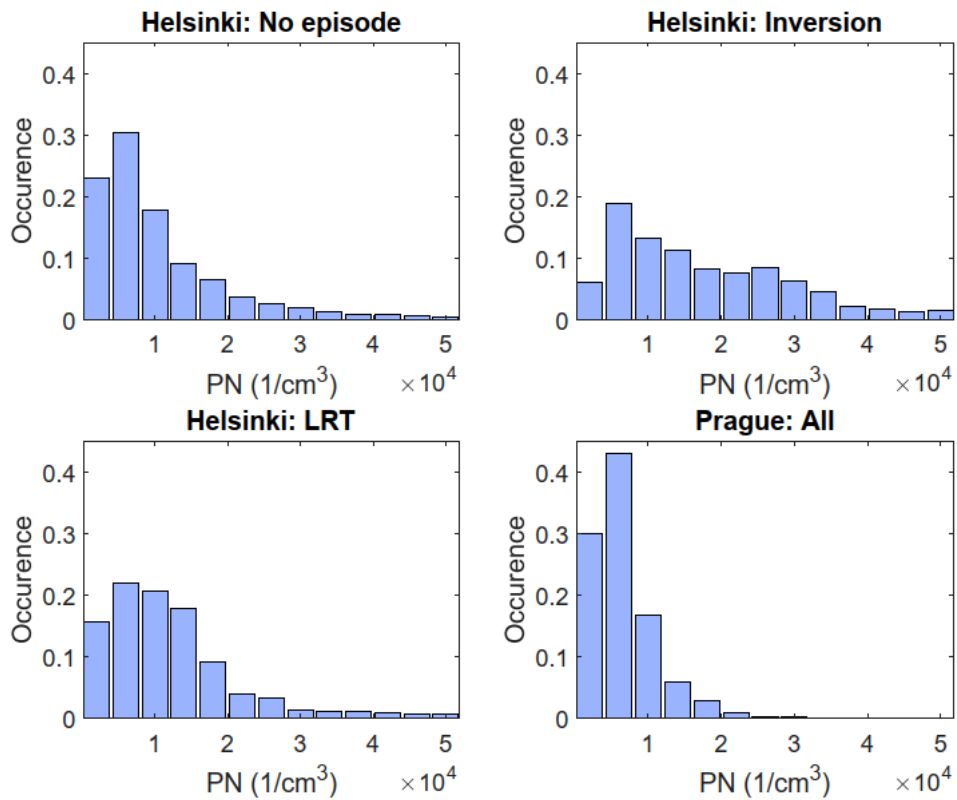

Figure S8: Histogram of the measured particle number (PN) concentrations in Helsinki and Prague.

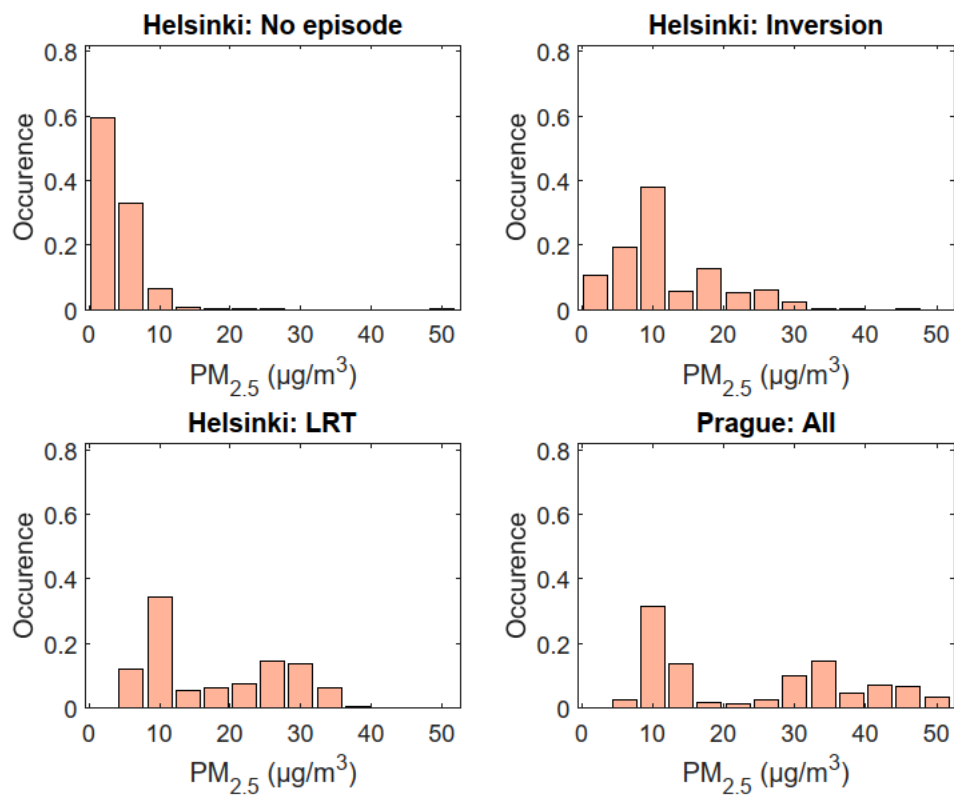

Figure S9: Histogram of the measured PM<sub>2.5</sub> concentrations in Helsinki and Prague measurements.

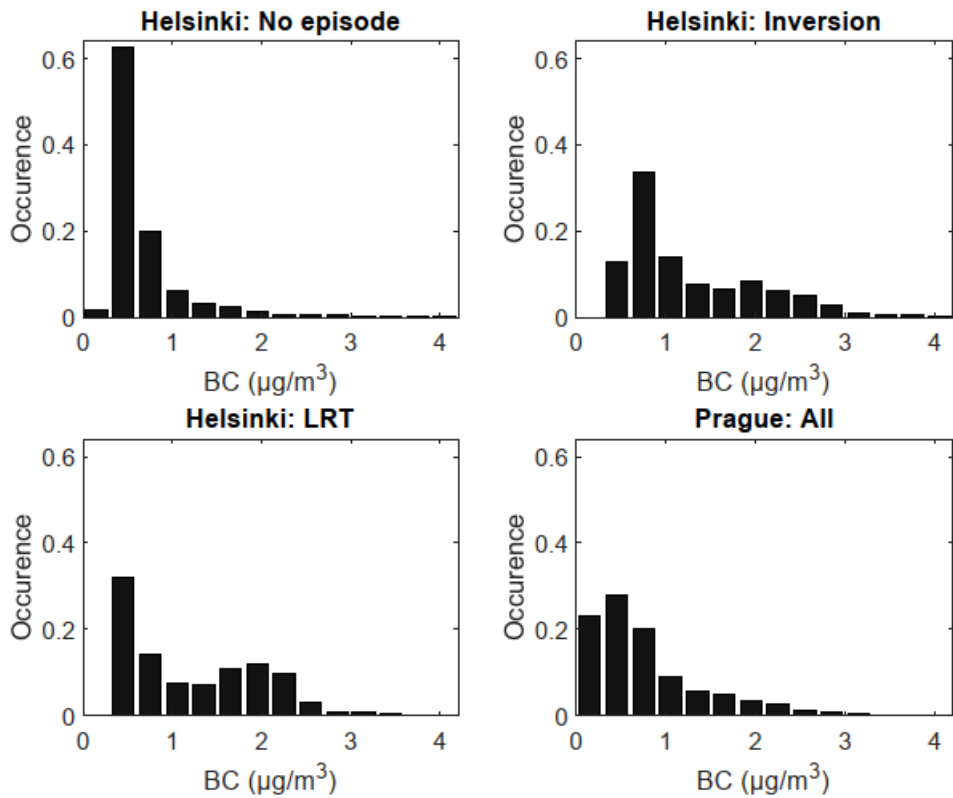

Figure S10: Histogram of the measured black carbon (BC) concentrations in Helsinki and Prague measurements.

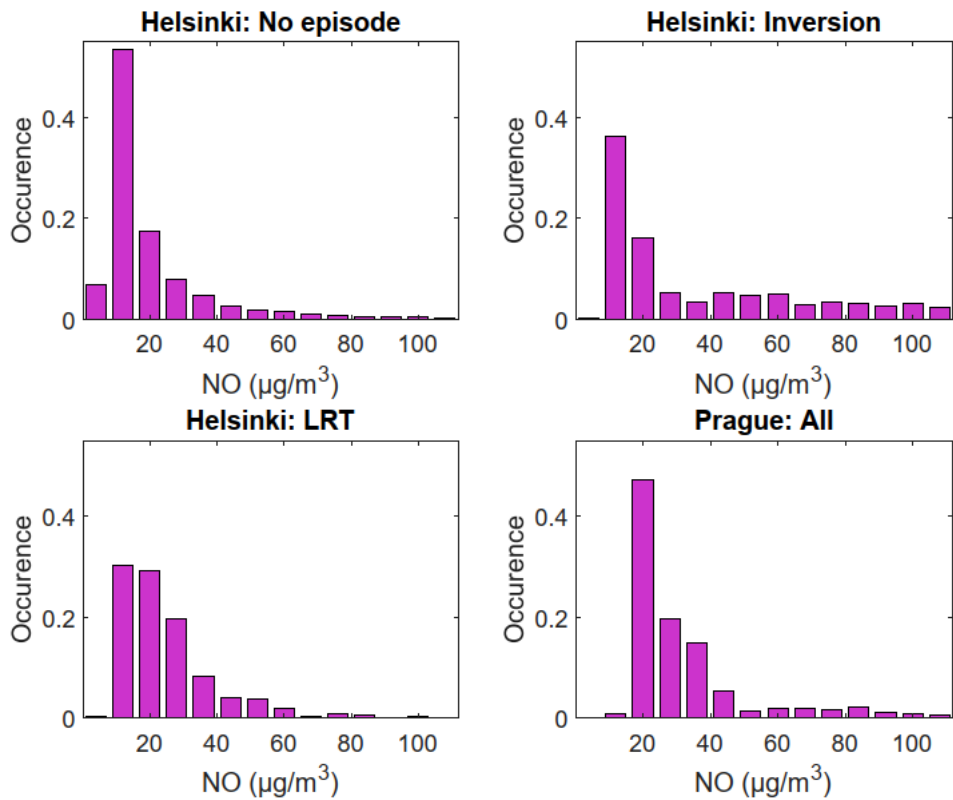

Figure S11: Histogram of the measured NO concentrations in Helsinki and Prague measurements.



## LDSA<sup>al</sup> concentrations

Table S2: Data of the measured average LDSA<sup>al</sup> concentrations in Figures 1–6, including the 25<sup>th</sup> and 75<sup>th</sup> percentile whiskers. Note that Partector results cannot be corrected based on the particle effective density ( $\rho_{\text{eff}}$ ) nor hygroscopicity.

| <b>Helsinki: No episodes, LDSA<sup>al</sup> (<math>\mu\text{m}^2/\text{cm}^3</math>)</b> |                         |                         |                  |
|------------------------------------------------------------------------------------------|-------------------------|-------------------------|------------------|
|                                                                                          | ELPI+                   | DMPS                    | Partector        |
| General assumptions                                                                      | <i>11.5 (6.9–17.7)</i>  | <i>8.5 (5.0–13.7)</i>   | 10.5 (6.1–17.0)  |
| $\rho_{\text{eff}}$ -corrected                                                           | <i>11.3 (6.8–17.4)</i>  | <i>8.6 (5.0–13.8)</i>   |                  |
| $\rho_{\text{eff}}$ - and hygroscopicity corrected                                       | <i>10.2 (6.2–15.7)</i>  | <i>8.2 (4.9–12.8)</i>   |                  |
| <b>Helsinki: Inversion, LDSA<sup>al</sup> (<math>\mu\text{m}^2/\text{cm}^3</math>)</b>   |                         |                         |                  |
|                                                                                          | ELPI+                   | DMPS                    | Partector        |
| General assumptions                                                                      | <i>28.4 (16.3–53.9)</i> | <i>20.2 (11.1–39.3)</i> | 24.7 (13.1–45.8) |
| $\rho_{\text{eff}}$ -corrected                                                           | <i>26.7 (15.3–51.9)</i> | <i>20.5 (11.2–39.9)</i> |                  |
| $\rho_{\text{eff}}$ - and hygroscopicity corrected                                       | <i>26.5 (16.1–49.4)</i> | <i>20.7 (12.0–38.6)</i> |                  |
| <b>Helsinki: LRT, LDSA<sup>al</sup> (<math>\mu\text{m}^2/\text{cm}^3</math>)</b>         |                         |                         |                  |
|                                                                                          | ELPI+                   | DMPS                    | Partector        |
| General assumptions                                                                      | <i>26.9 (15.6–46.6)</i> | <i>18.6 (11.0–30.9)</i> | 20.5 (11.5–34.1) |
| $\rho_{\text{eff}}$ -corrected                                                           | <i>24.7 (14.5–42.7)</i> | <i>19.5 (11.4–32.7)</i> |                  |
| $\rho_{\text{eff}}$ - and hygroscopicity corrected                                       | <i>23.6 (12.8–44.8)</i> | <i>19.6 (11.0–34.4)</i> |                  |
| <b>Prague: All, LDSA<sup>al</sup> (<math>\mu\text{m}^2/\text{cm}^3</math>)</b>           |                         |                         |                  |
|                                                                                          | ELPI+                   | SMPS                    | Partector        |
| General assumptions                                                                      | <i>27.1 (15.6–42.3)</i> | <i>14.7 (9.5–20.5)</i>  | 18.1 (11.6–25.0) |
| $\rho_{\text{eff}}$ -corrected                                                           | <i>23.3 (13.6–35.7)</i> | <i>15.5 (9.9–21.7)</i>  |                  |
| $\rho_{\text{eff}}$ - and hygroscopicity corrected                                       | <i>24.7 (14.8–38.0)</i> | <i>15.0 (9.4–21.1)</i>  |                  |

## Helsinki: No episode

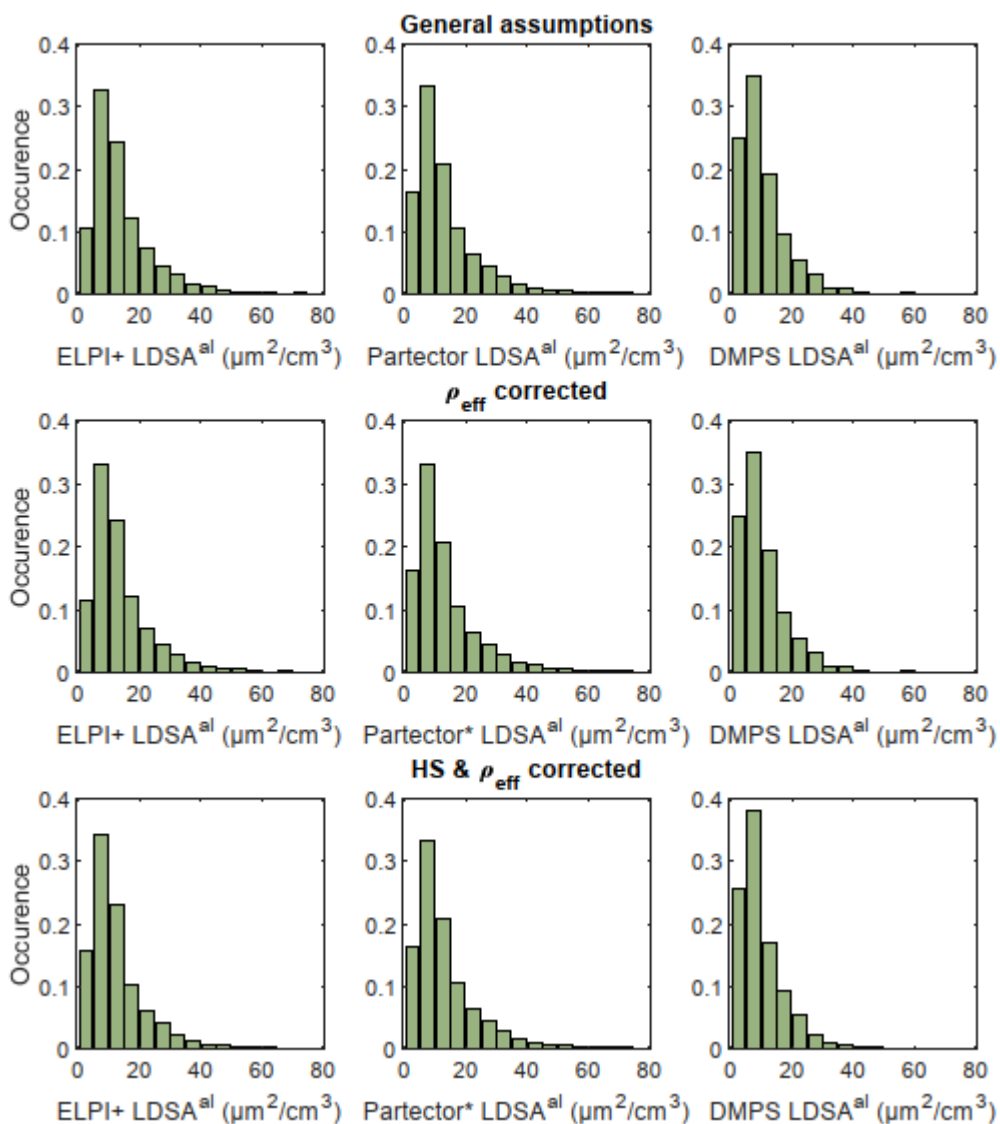

Figure S12: Histograms of the measured LDSA<sup>al</sup> concentrations with general assumptions, with effective density ( $\rho_{\text{eff}}$ ) correction, and with corrections for hygroscopicity (HS) and effective density in Helsinki without episodes. \*Note that effective density and hygroscopicity cannot be considered in the Partector results.

## Helsinki: Inversion

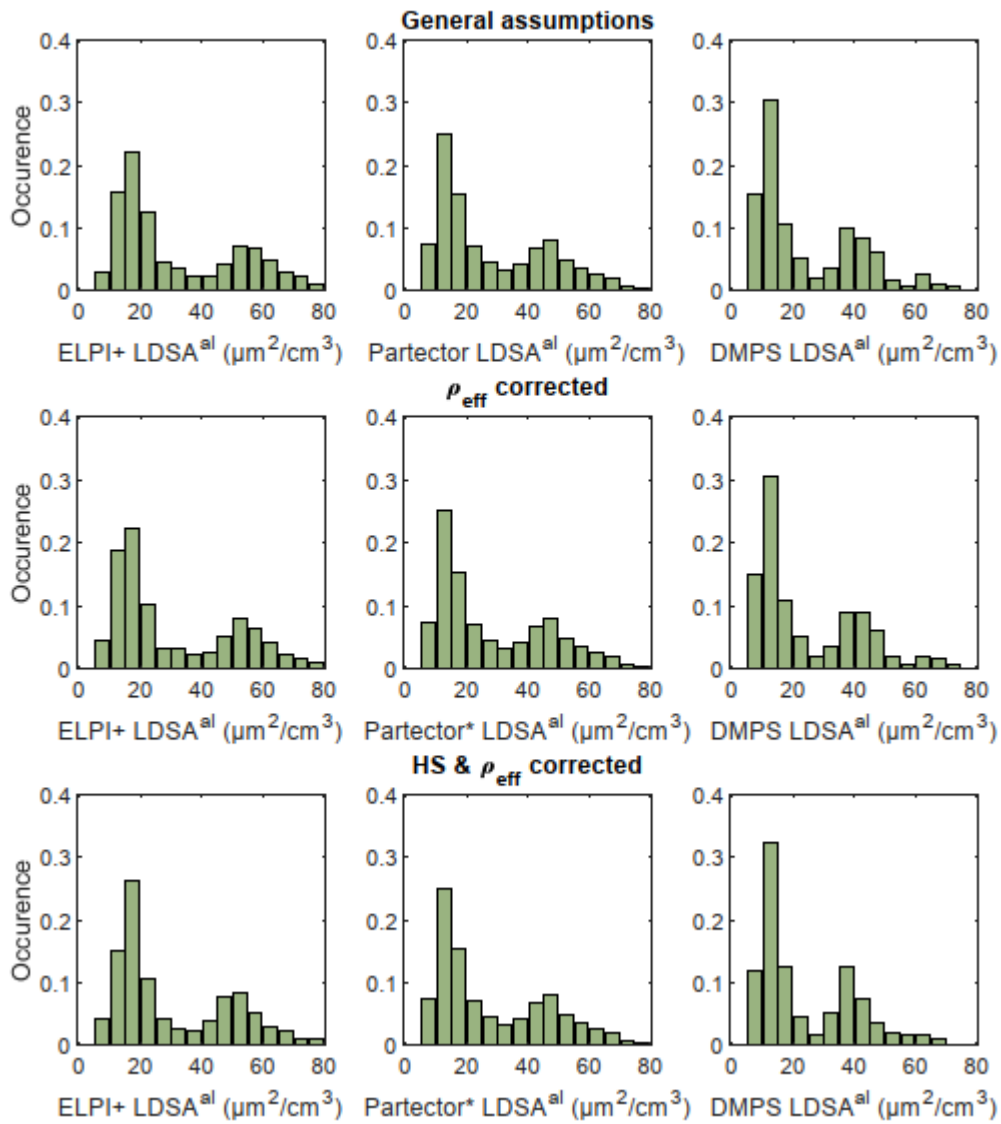

Figure S13: Histograms of the measured LDSA<sup>al</sup> concentrations with general assumptions, with effective density ( $\rho_{\text{eff}}$ ) correction, and with corrections for hygroscopicity (HS) and effective density in Helsinki during the inversion episode. \*Note that effective density and hygroscopicity cannot be considered in the Partector results.

### Helsinki: LRT

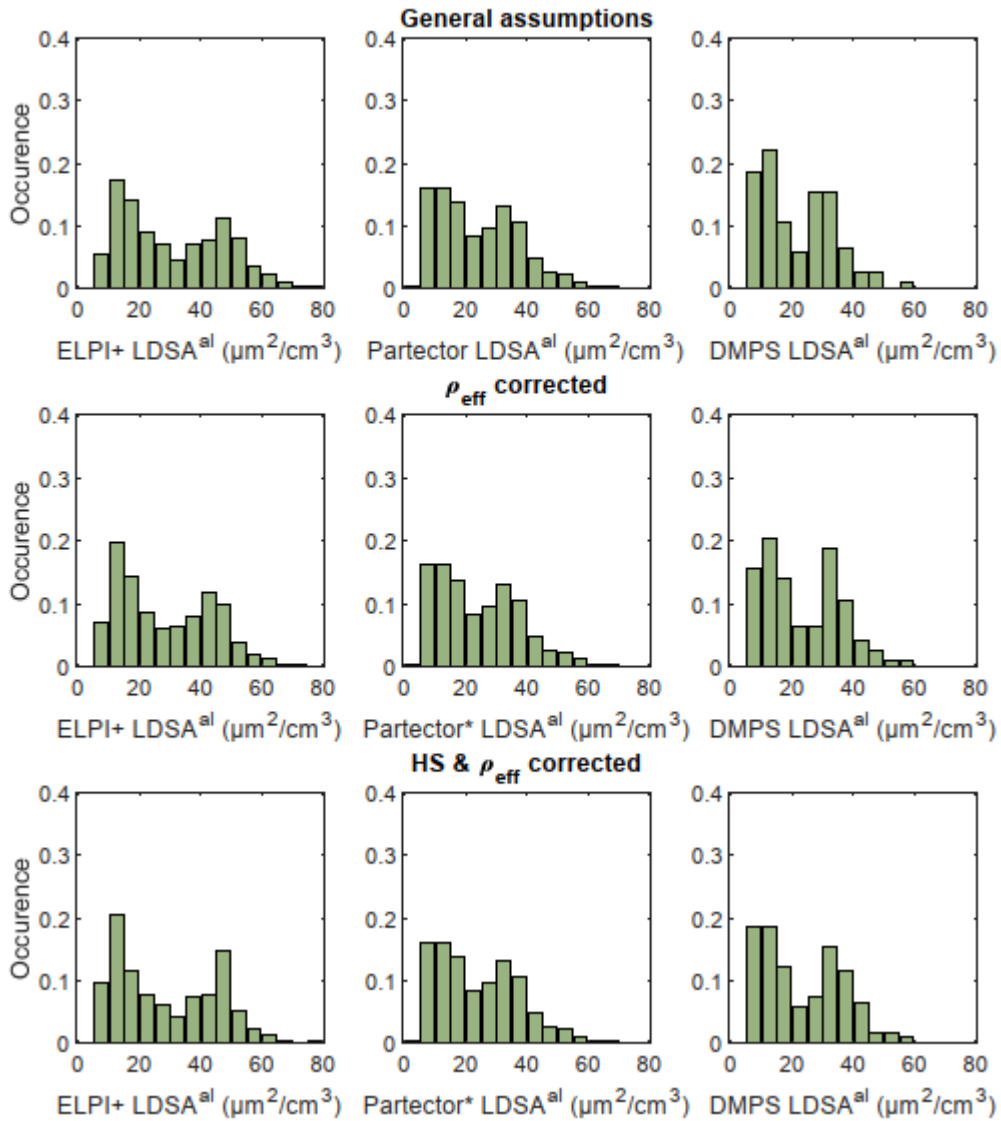

Figure S14: Histograms of the measured LDSA<sup>al</sup> concentrations with general assumptions, with effective density ( $\rho_{\text{eff}}$ ) correction, and with corrections for hygroscopicity (HS) and effective density in Helsinki during the LRT episode. \*Note that effective density and hygroscopicity cannot be considered in the Partector results.

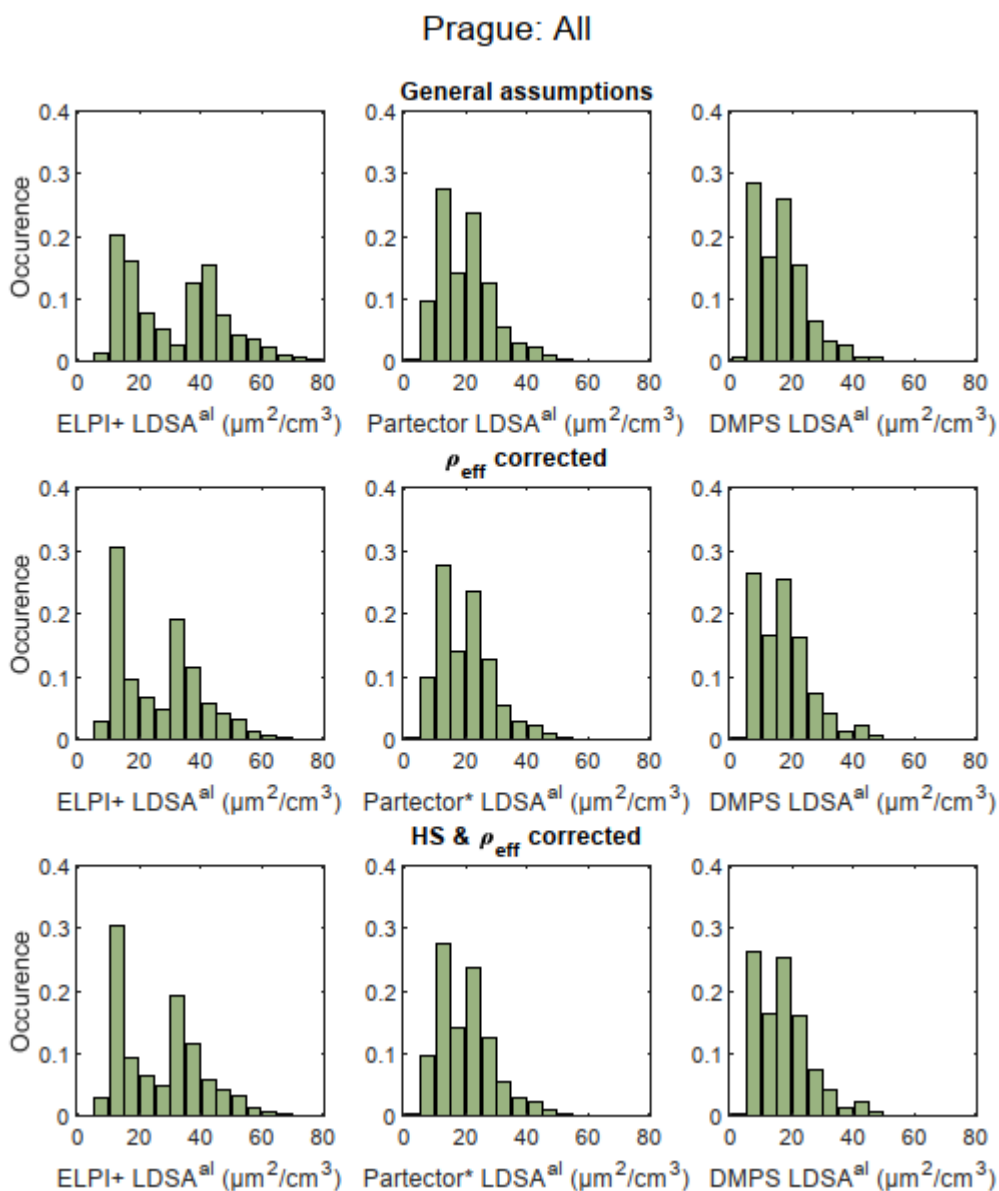

Figure S15: Histograms of the measured LDSA<sup>al</sup> concentrations with general assumptions, with effective density ( $\rho_{\text{eff}}$ ) correction, and with corrections for hygroscopicity (HS) and effective density in Prague. \*Note that effective density and hygroscopicity cannot be considered in the Partector results.

Table S3: Average measured concentrations, including 25<sup>th</sup> and 75<sup>th</sup> percentiles in Figure 8 and Figure S20-22.

|                                  | <b>ELPI+<br/>LDSA<sup>al</sup> &lt;<br/>2.5 µm<br/>(µm<sup>2</sup>/cm<sup>3</sup>)</b> | <b>ELPI+<br/>LDSA<sup>al</sup> &lt;<br/>0.4 µm<br/>(µm<sup>2</sup>/cm<sup>3</sup>)</b> | <b>Partector<br/>LDSA<sup>al</sup><br/>(µm<sup>2</sup>/cm<sup>3</sup>)</b> | <b>ELPI+<br/>PN<br/>(1/cm<sup>3</sup>)</b> | <b>ELPI+<br/>PM<sub>2.5</sub><br/>(µg/m<sup>3</sup>)</b> |
|----------------------------------|----------------------------------------------------------------------------------------|----------------------------------------------------------------------------------------|----------------------------------------------------------------------------|--------------------------------------------|----------------------------------------------------------|
| <b>Helsinki: No episode</b>      | 11.5 (6.9–17.7)                                                                        | 9.8 (5.7–16.0)                                                                         | 10.5 (6.1–17.0)                                                            | 7 700 (4 100–13 700)                       | 3.4 (2.3–5.2)                                            |
| <b>Helsinki: Inversion</b>       | 28.4 (16.3–53.9)                                                                       | 22.9 (11.9–45.3)                                                                       | 24.7 (13.1–45.8)                                                           | 16 200 (8 100–29 200)                      | 9.9 (7.2–16.6)                                           |
| <b>Helsinki: LRT</b>             | 26.9 (15.6–46.6)                                                                       | 19.1 (11.1–31.2)                                                                       | 20.5 (11.5–34.1)                                                           | 9 700 (5 600–15 500)                       | 15.4 (9.5–26.8)                                          |
| <b>Prague: All</b>               | 27.1 (15.6–42.3)                                                                       | 14.0 (9.2–19.4)                                                                        | 18.1 (11.6–25.0)                                                           | 5 700 (3 700–8 100)                        | 20.2 (11.1–35.3)                                         |
| <b>Tampere: No episode</b>       | 8.3 (4.7–13.9)                                                                         | 5.7 (3.2–9.6)                                                                          | 6.3 (3.6–10.3)                                                             | 2 800 (1 400–5 900)                        | 4.2 (2.4–8.2)                                            |
| <b>Tampere: Inversion</b>        | 55.5 (40.6–86.9)                                                                       | 44.6 (31.4–68.9)                                                                       | 46.8 (33.9–71.9)                                                           | 23 800 (16 700–34 500)                     | 22.9 (16.2–38.0)                                         |
| <b>Düsseldorf: Urban traffic</b> | 31.8 (21.3–49.3)                                                                       | 18.8 (13.4–23.4)                                                                       | 21.0 (15.1–26.7)                                                           | 12 700 (8 700–16 600)                      | 20.7 (12.0–35.1)                                         |
| <b>Düsseldorf: Highway</b>       | 36.6 (24.8–47.5)                                                                       | 27.2 (17.9–38.3)                                                                       | 30.8 (20.6–43.5)                                                           | 28 900 (16 300–48 700)                     | 17.1 (11.6–24.6)                                         |
| <b>Düsseldorf: Airport</b>       | 34.2 (30.6–41.9)                                                                       | 24.4 (19.1–31.7)                                                                       | 27.4 (21.8–35.6)                                                           | 26 400 (16 100–44 500)                     | 16.9 (13.0–25.5)                                         |
| <b>Düsseldorf: River</b>         | 33.0 (24.9–50.2)                                                                       | 17.6 (12.5–24.9)                                                                       | 20.8 (15.2–28.5)                                                           | 11 700 (8 300–13 600)                      | 24.6 (19.7–44.3)                                         |



With general assumptions

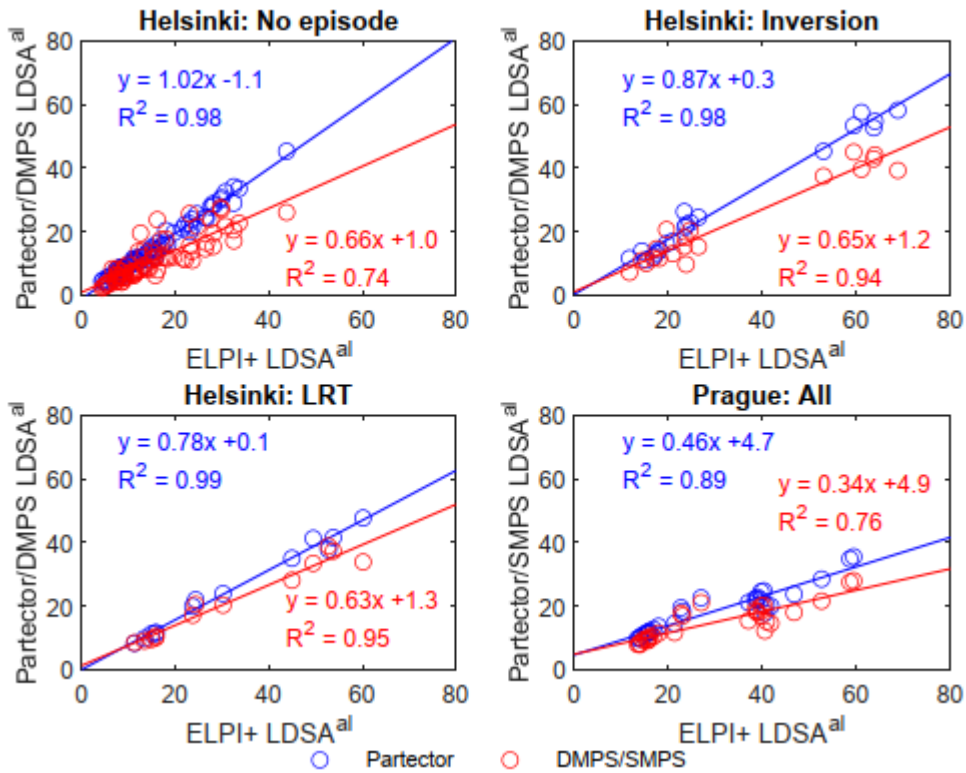

Figure S16: Scatter plot and linear fits between hourly averaged ELPI+ LDSA<sup>al</sup> (μm<sup>2</sup>/cm<sup>3</sup>) and Partector or DMPS/SMPS LDSA<sup>al</sup> (μm<sup>2</sup>/cm<sup>3</sup>) with general assumptions.

After  $\rho_{\text{eff}}$  correction

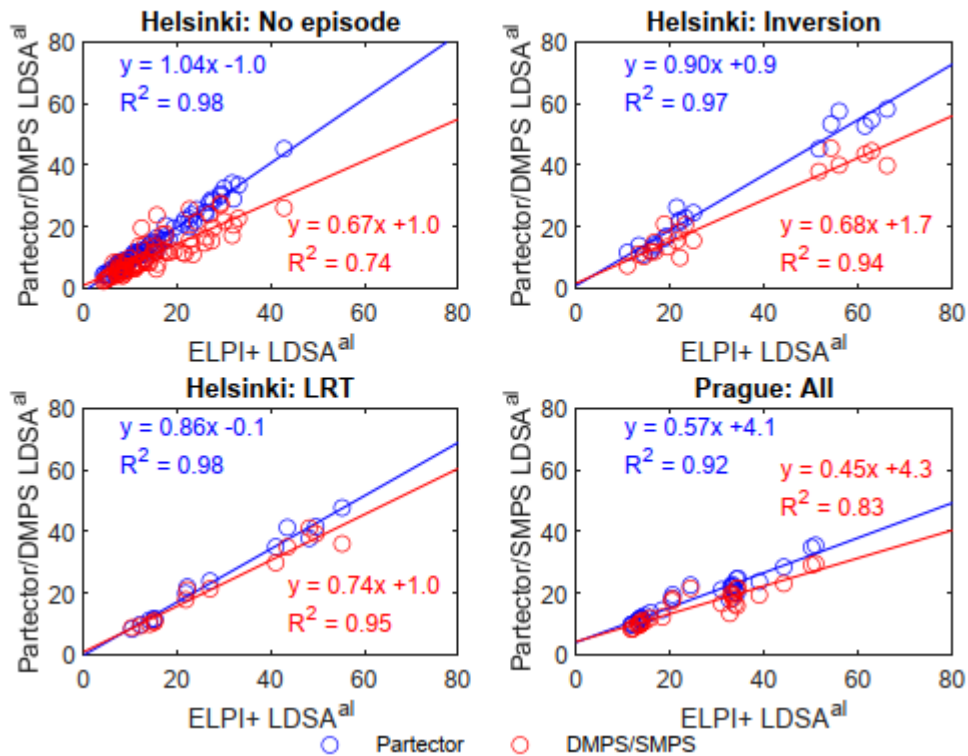

Figure S17: Scatter plot and linear fits between hourly averaged ELPI+ LDSA<sup>al</sup> (μm<sup>2</sup>/cm<sup>3</sup>) and Partector or DMPS/SMPS LDSA<sup>al</sup> (μm<sup>2</sup>/cm<sup>3</sup>) after  $\rho_{\text{eff}}$  correction (not for Partector).

After HS &  $\rho_{\text{eff}}$  correction

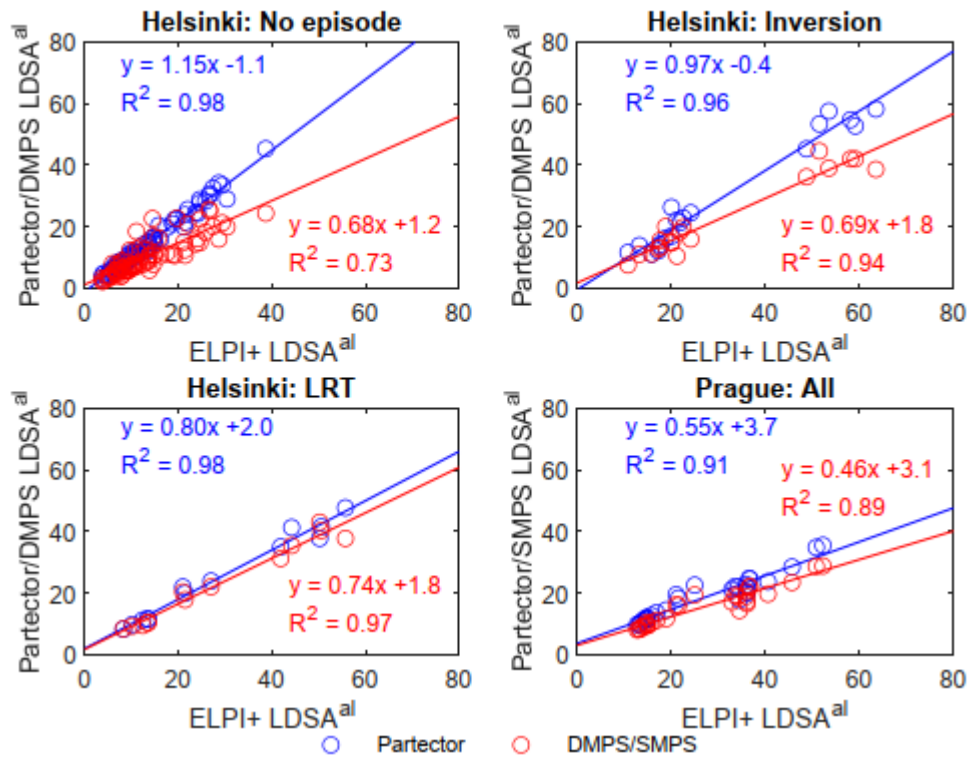

Figure S18: Scatter plot and linear fits between hourly averaged ELPI+ LDSA<sup>al</sup> ( $\mu\text{m}^2/\text{cm}^3$ ) and Partector or DMPS/SMPS LDSA<sup>al</sup> ( $\mu\text{m}^2/\text{cm}^3$ ) after hygroscopicity (HS) and  $\rho_{\text{eff}}$  correction (not for Partector).

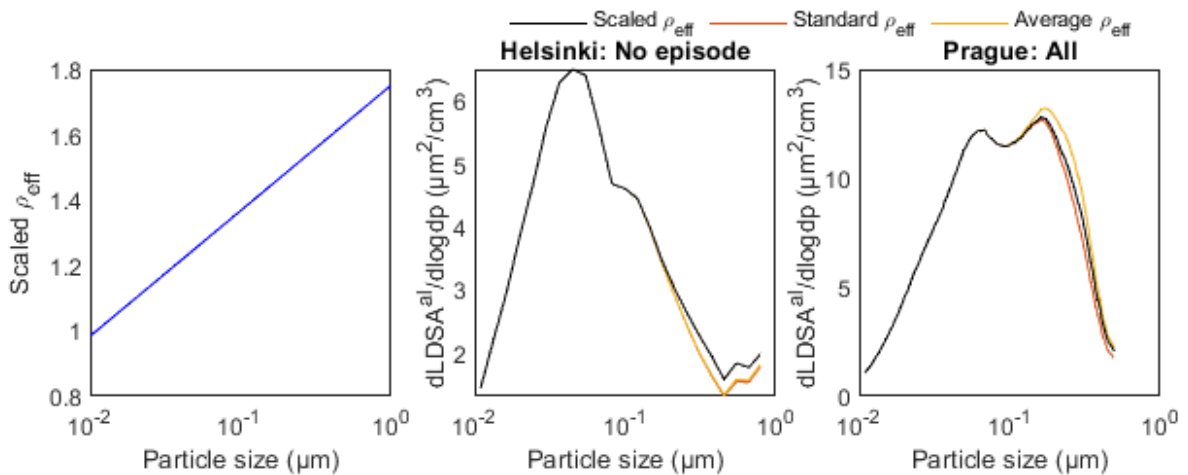

Figure S19: Comparison of average LDSA<sup>al</sup> size distributions with Helsinki: All (DMPS) and Prague: All (SMPS) data by using scaled size-dependent effective density ( $\rho_{\text{eff}}$ ), standard  $\rho_{\text{eff}}$  ( $1.0 \text{ g/cm}^3$ ) and averaged  $\rho_{\text{eff}}$  for all sizes (Helsinki:  $1.1 \text{ g/cm}^3$ , Prague  $2.0 \text{ g/cm}^3$ ). Scaled  $\rho_{\text{eff}}$  function is showed in the first figure panel and is based on studies by Virtanen et al. (2006), Rissler et al. (2014), Yin et al. (2015) and Lu et al. (2024).

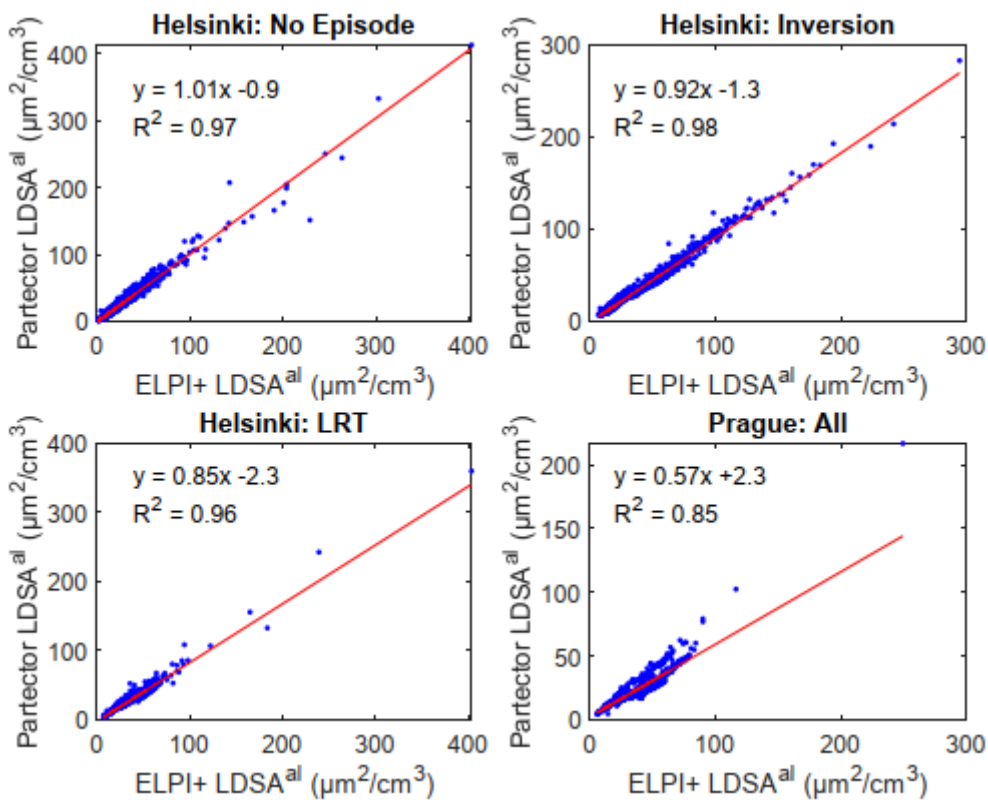

Figure S20: Scatter plots between measured LDSA<sup>al</sup> concentrations with the ELPI+ and the Partector (with general assumptions) in Helsinki and Prague. Outliers of LDSA<sup>al</sup> > 500  $\mu\text{m}^2/\text{cm}^3$  were removed from the scatter plots.

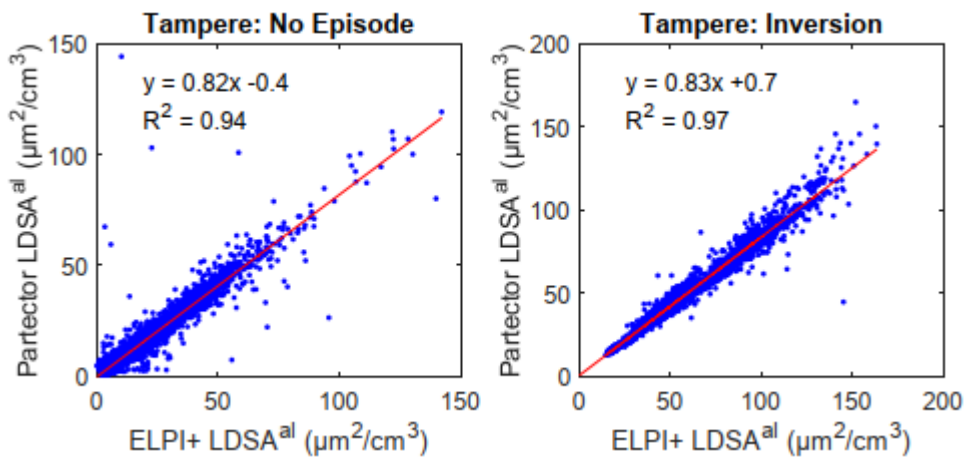

Figure S21: Scatter plots between measured LDSA<sup>al</sup> concentrations with the ELPI+ and the Partector (with general assumptions) in Tampere. Outliers of LDSA<sup>al</sup> > 500  $\mu\text{m}^2/\text{cm}^3$  were removed from the scatter plots.

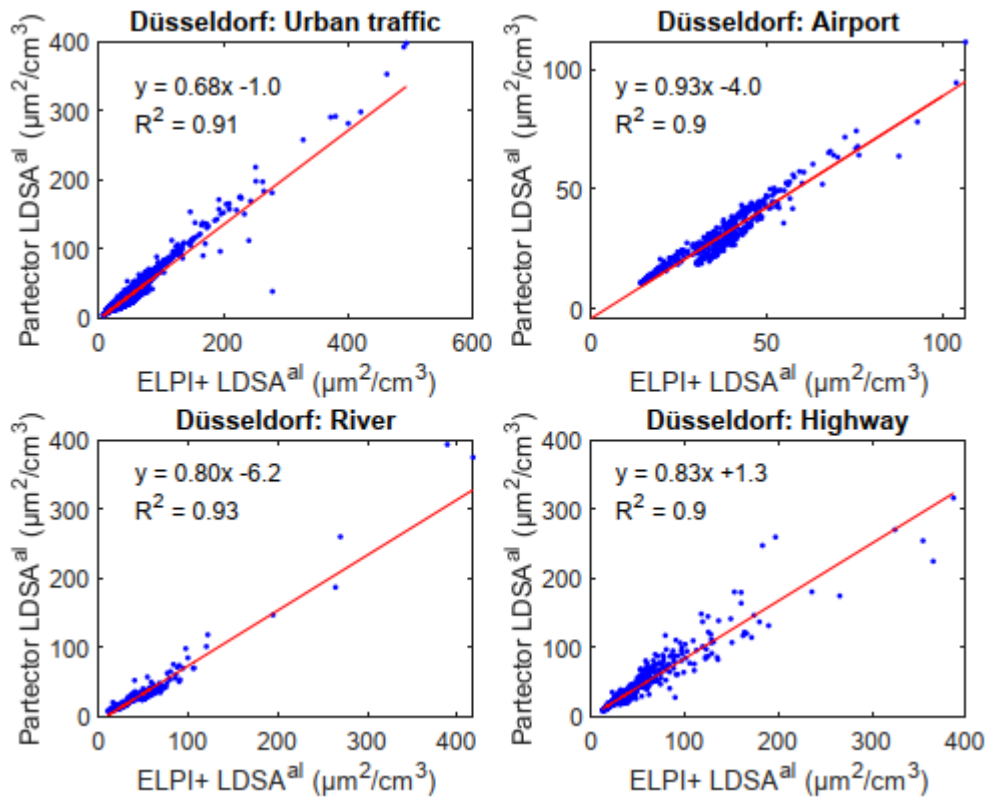

Figure S22: Scatter plots between measured LDSA<sup>al</sup> concentrations with the ELPI+ and the Partector (with general assumptions) in Düsseldorf. Outliers of LDSA<sup>al</sup> > 500  $\mu\text{m}^2/\text{cm}^3$  were removed from the scatter plots.

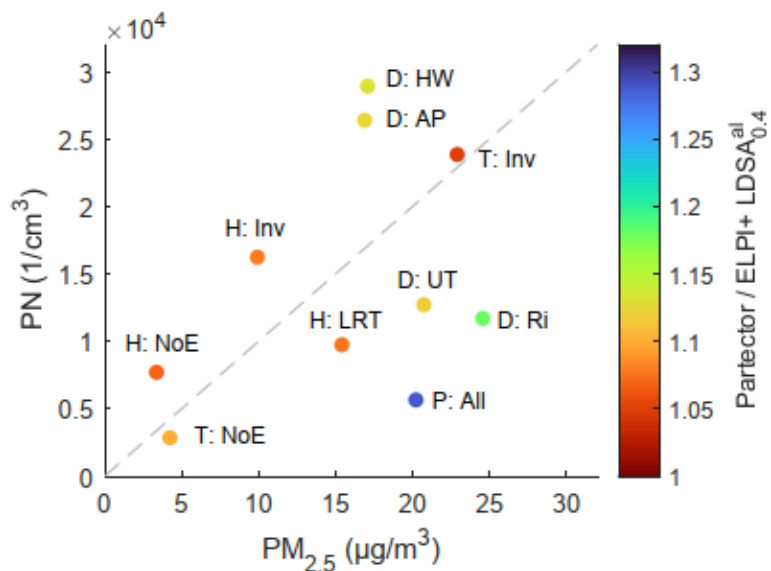

Figure S23: Comparison of LDSA<sup>al</sup> concentrations measured with Partector and ELPI+ as a function of particle number (PN) and PM<sub>2.5</sub> concentration. With ELPI+ only particles smaller than 400 nm are considered (LDSA<sup>al</sup><sub>0.4</sub>). Each dot represents individual measurements in different locations (Table S2).

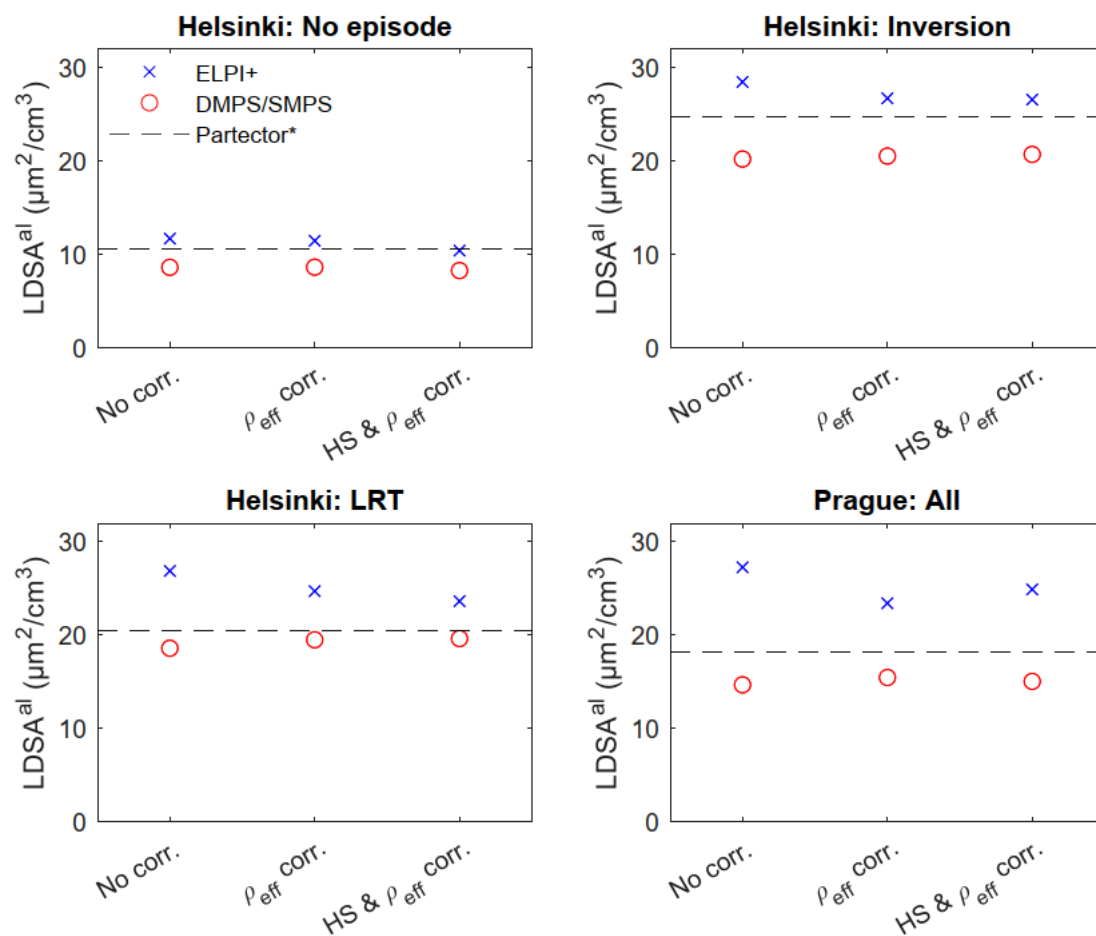

Figure S24: Comparison of average LDSA<sup>al</sup> concentrations. “No corr.” indicates data measured with the general assumptions, “ $\rho_{\text{eff}}$  corr.” indicates data corrected with the effective density and “ $\rho_{\text{eff}}$  & HS corr.” indicates data corrected with both effective density and hygroscopicity. The DMPS measured in Helsinki, and the SMPS in Prague. \*Note that the corrections cannot be done with the Partector data.

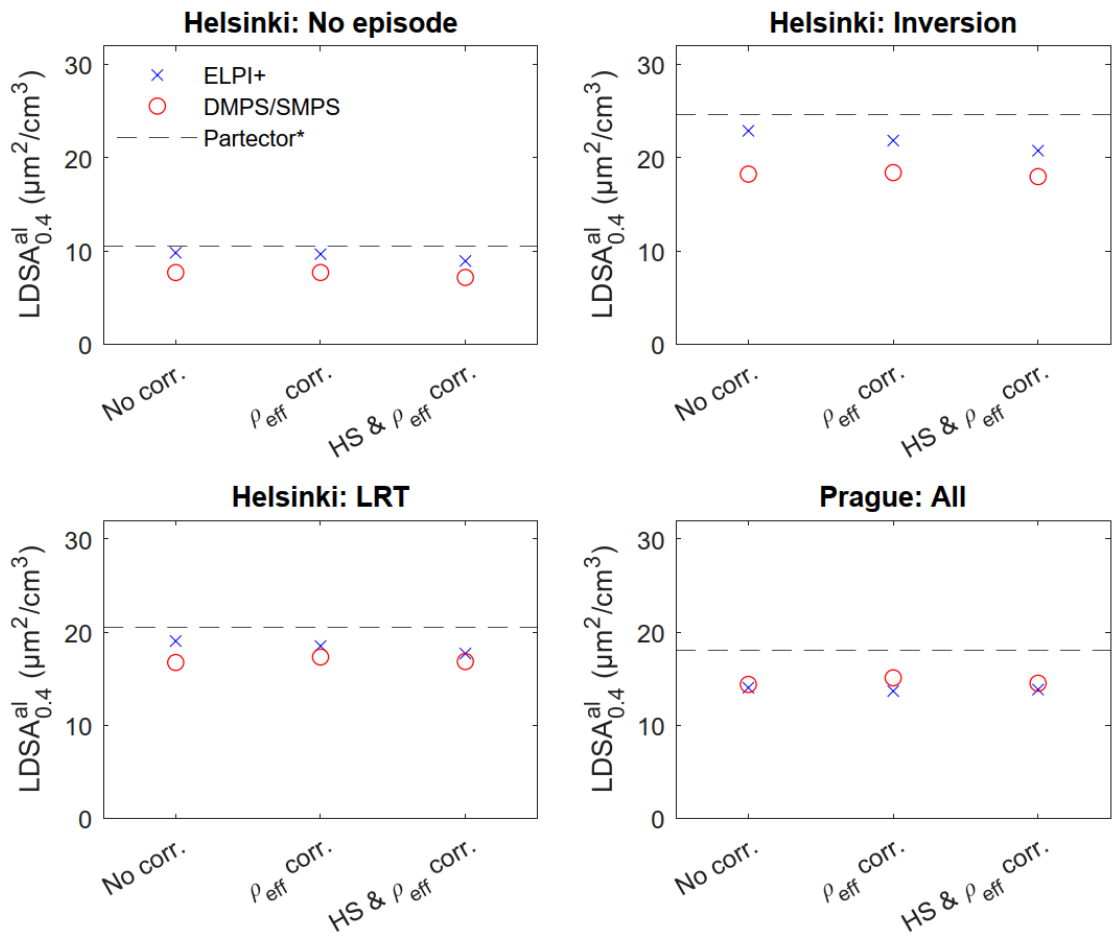

Figure S25: Comparison of average LDSA<sup>al</sup> concentrations attributable to particles smaller than 400 nm. “No corr.” indicates data measured with the general assumptions, “ρ<sub>eff</sub> corr.” indicates data corrected with the effective density and “ρ<sub>eff</sub> & HS corr.” indicates data corrected with both effective density and hygroscopicity. The DMPS measured in Helsinki, and the SMPS in Prague. \*Note that the corrections cannot be done with the Partector data.
